# Supplementary material for: Night shift work and risk of aggressive prostate cancer in the Norwegian Offshore Petroleum Workers (NOPW) cohort
Source: PubMed Central journal article supplement — Int J Epidemiol. 2022 Dec 22;52(4):1003–14. doi: 10.1093/ije/dyac235 (PMC10396420; doi:10.1093/ije/dyac235), 2022-12-22
Supplement: dyac235_supplementary_data.pdf [file dyac235_supplementary_data.pdf]

## Supplementary material

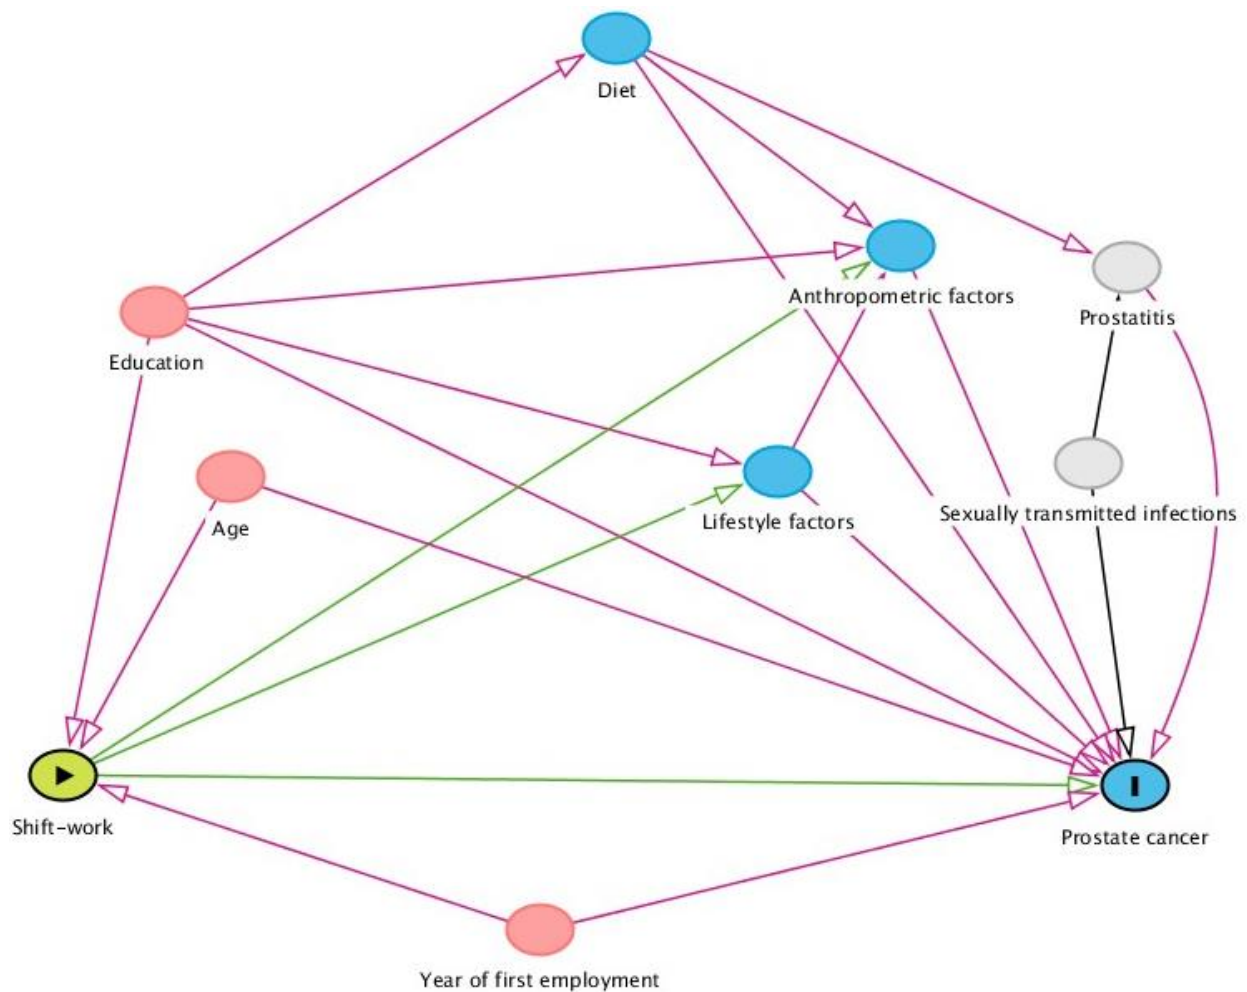

**Supplementary Figure S1.**

Directed acyclic graph of the relationship between night shift work among offshore petroleum workers and aggressive prostate cancer risk. Produced by the DAGitty v.3.0 software. The yellow circle is the exposure (night shift work), the blue circle with the I is the outcome (aggressive prostate cancer), the red circles are ancestors of both the exposure and outcome (i.e. confounders included in the models), the blue circles are ancestors of the outcome (and hence not included in the model), and the grey circles are unobserved (latent) variables.

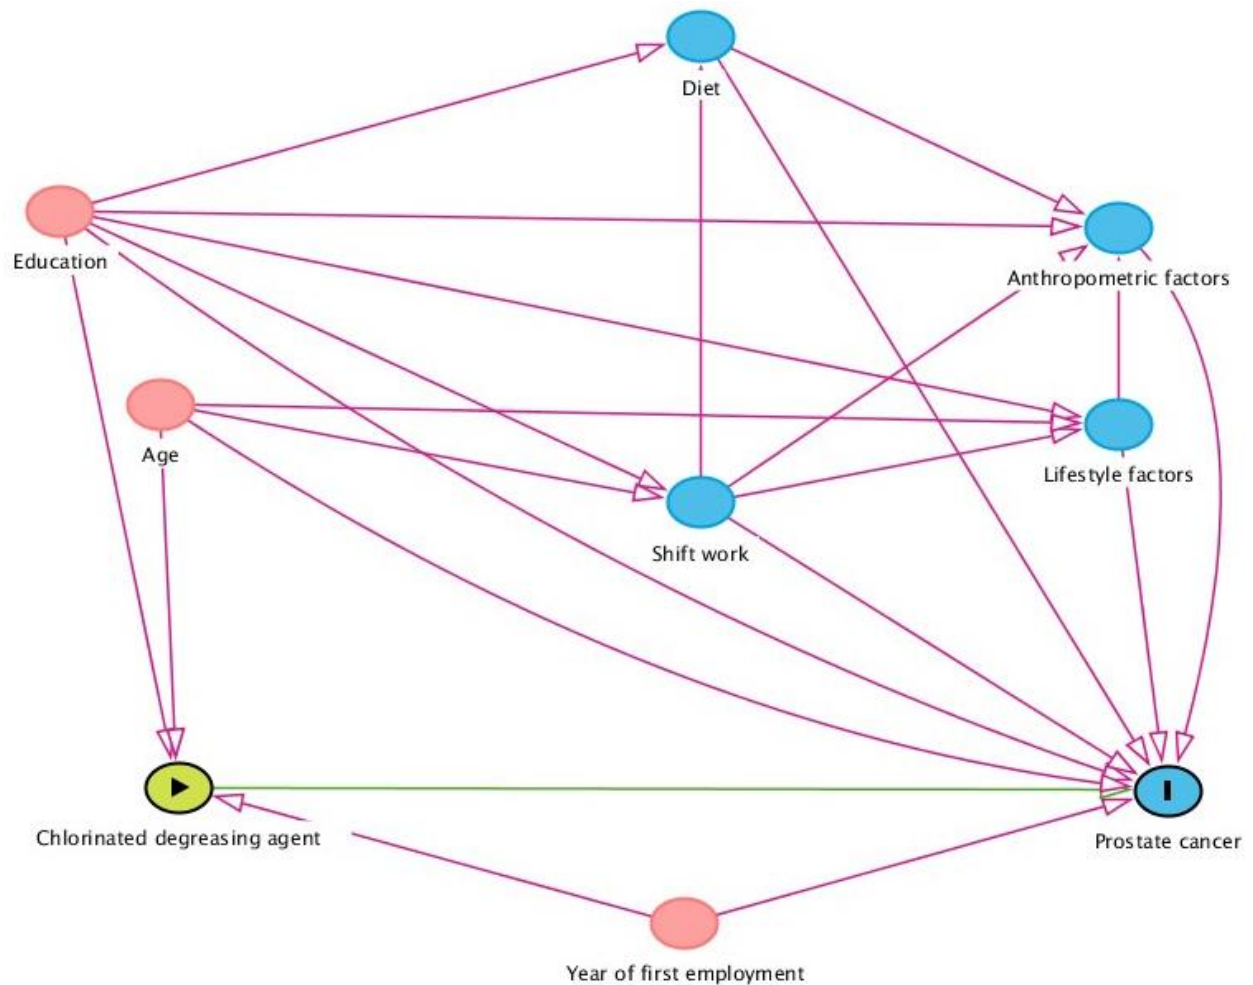

**Supplementary Figure S2.**

Directed acyclic graph of the relationship between exposure to chlorinated degreasing agents among offshore petroleum workers and aggressive prostate cancer risk. Produced by the DAGitty v.3.0 software. The yellow circle is the exposure (chlorinated degreasing agents), the blue circle with the I is the outcome (aggressive prostate cancer), the red circles are ancestors of both the exposure and outcome (i.e. confounders included in the models), while the blue circles are ancestors of the outcome (and hence not included in the model).

**Supplementary Table S1.** Characteristics of the study sample (n=2355) in the Norwegian Offshore Petroleum Workers Cohort, stratified by work schedule.

|                                                                    | Work schedule    |      |                      |      |                   |      |                       |      |                                  |      |
|--------------------------------------------------------------------|------------------|------|----------------------|------|-------------------|------|-----------------------|------|----------------------------------|------|
|                                                                    | Day shifts only  |      | Rollover shifts only |      | Night shifts only |      | Mixed shift work only |      | Completely missing work schedule |      |
| Characteristics <sup>a</sup>                                       | n=969            |      | n=857                |      | n=37              |      | n=373                 |      | n=119                            |      |
|                                                                    | n                | %    | n                    | %    | n                 | %    | n                     | %    | n                                | %    |
| <b>Case</b>                                                        |                  |      |                      |      |                   |      |                       |      |                                  |      |
| Yes                                                                | 112              | 11.6 | 112                  | 13.1 | 5                 | 13.5 | 53                    | 14.2 | 17                               | 14.3 |
| No                                                                 | 857              | 88.4 | 745                  | 86.9 | 32                | 86.5 | 320                   | 85.8 | 102                              | 85.7 |
| <b>Age in 1998</b>                                                 |                  |      |                      |      |                   |      |                       |      |                                  |      |
| Median (range)                                                     | 54 (21-79)       |      | 54 (23-78)           |      | 53 (20-73)        |      | 52 (31-73)            |      | 58 (34-80)                       |      |
| 15-24                                                              | <5               | NA   | <5                   | NA   | <5                | NA   | 0                     | 0    | 0                                | 0    |
| 25-34                                                              | 16               | 1.7  | 31                   | 3.6  | <5                | NA   | <5                    | NA   | <5                               | NA   |
| 35-44                                                              | 130              | 13.4 | 106                  | 12.4 | 5                 | 13.5 | 68                    | 18.2 | 6                                | 5.0  |
| 45-54                                                              | 386              | 39.8 | 304                  | 35.5 | 16                | 43.3 | 167                   | 44.8 | 35                               | 29.4 |
| 55-64                                                              | 315              | 32.5 | 285                  | 33.3 | 8                 | 21.6 | 110                   | 29.5 | 41                               | 34.5 |
| 65-74                                                              | 112              | 11.6 | 122                  | 14.2 | 5                 | 13.5 | 24                    | 6.4  | 31                               | 26.1 |
| 75-84                                                              | <25              | NA   | <25                  | NA   | 0                 | 0    | <5                    | NA   | <5                               | NA   |
| <b>Education</b>                                                   |                  |      |                      |      |                   |      |                       |      |                                  |      |
| Compulsory                                                         | 129              | 13.3 | 152                  | 17.7 | <25               | NA   | 58                    | 15.6 | 25                               | 21.0 |
| Vocational                                                         | 442              | 45.6 | 471                  | 54.9 | 17                | 46.0 | 197                   | 52.8 | 63                               | 52.9 |
| Upper secondary                                                    | 140              | 14.5 | 118                  | 13.8 | 8                 | 21.6 | 49                    | 13.1 | 14                               | 11.8 |
| University/college                                                 | 254              | 26.2 | 106                  | 12.4 | <5                | NA   | 67                    | 18.0 | 13                               | 10.9 |
| Missing                                                            | 4                | 0.4  | 10                   | 1.2  | <5                | NA   | 2                     | 0.5  | 4                                | 3.4  |
| <b>BMI (kg/m<sup>2</sup>) n (%), median (range)<sup>a, b</sup></b> | 25.5 (18.0–60.8) |      | 25.6 (17.5–36.8)     |      | 26.0 (13.7–42.0)  |      | 25.7 (18.4–43.3)      |      | 25.2 (19.0–34.0)                 |      |
| BMI <25                                                            | 403              | 41.6 | 346                  | 40.4 | 14                | 37.8 | 139                   | 37.3 | 50                               | 42.0 |
| BMI ≥25                                                            | 546              | 56.3 | 500                  | 58.3 | 23                | 62.2 | 233                   | 62.5 | 60                               | 50.4 |
| Missing                                                            | 20               | 2.1  | 11                   | 1.3  | 0                 | 0    | 1                     | 0.2  | 9                                | 7.6  |
| <b>Year of first employment</b>                                    |                  |      |                      |      |                   |      |                       |      |                                  |      |
| 1967-1979                                                          | 429              | 44.3 | 470                  | 54.8 | 16                | 43.2 | 240                   | 64.3 | 74                               | 62.2 |
| 1980-1989                                                          | 419              | 43.2 | 308                  | 36.0 | 15                | 40.6 | 117                   | 31.4 | 35                               | 29.4 |
| 1990-1999                                                          | 121              | 12.5 | 79                   | 9.2  | 6                 | 16.2 | 16                    | 4.3  | 9                                | 7.6  |
| Missing                                                            | 0                | 0    | 0                    | 0    | 0                 | 0    | 0                     | 0    | <5                               | NA   |
| <b>Main activity in last position</b>                              |                  |      |                      |      |                   |      |                       |      |                                  |      |
| Production and process                                             | 20               | 2.1  | 131                  | 15.3 | <5                | NA   | 48                    | 12.9 | <5                               | NA   |
| Drilling and well maintenance                                      | 16               | 1.7  | 139                  | 16.2 | <5                | NA   | 47                    | 12.6 | <25                              | NA   |
| Maintenance/inspection/deck construction                           | 582              | 60.1 | 392                  | 45.7 | 11                | 29.7 | 153                   | 41.0 | 60                               | 50.4 |
| Catering/office/administration                                     | 177              | 18.2 | 63                   | 7.4  | 17                | 46.0 | 65                    | 17.4 | 22                               | 18.5 |
| Miscellaneous                                                      | 166              | 17.1 | 121                  | 14.1 | 5                 | 13.5 | 58                    | 15.6 | 24                               | 20.2 |
| Missing                                                            | 8                | 0.8  | 11                   | 1.3  | <5                | NA   | 2                     | 0.5  | 5                                | 4.2  |
| <b>Supervisor/manager</b>                                          |                  |      |                      |      |                   |      |                       |      |                                  |      |
| Yes                                                                | 481              | 49.6 | 306                  | 35.7 | 10                | 27.0 | 238                   | 63.8 | 50                               | 42.0 |
| No                                                                 | 475              | 49.0 | 537                  | 62.7 | 27                | 73.0 | 134                   | 35.9 | 58                               | 48.8 |

[illegible]

| <b>Supplementary Table S2:</b> Hazard Ratios (HR) and 95% confidence intervals (95% CI) of aggressive prostate cancer by median of workers with exposure to chlorinated degreasing agents.                              |                     |                          |
|-------------------------------------------------------------------------------------------------------------------------------------------------------------------------------------------------------------------------|---------------------|--------------------------|
| Duration (years) of chlorinated degreaser exposure <sup>a,b</sup>                                                                                                                                                       | No. cases/non-cases | HR (95% CI) <sup>d</sup> |
| 0                                                                                                                                                                                                                       | 49/320              | 1.00 (reference)         |
| <Median                                                                                                                                                                                                                 | 122/874             | 0.88 (0.60, 1.27)        |
| ≥Median                                                                                                                                                                                                                 | 125/843             | 0.78 (0.53, 1.13)        |
| <i>P</i> -trend <sup>e</sup>                                                                                                                                                                                            |                     | 0.201                    |
| Cumulative chlorinated degreaser exposure <sup>a,b,c</sup>                                                                                                                                                              |                     |                          |
| 0                                                                                                                                                                                                                       | 49/320              | 1.00 (reference)         |
| <Median                                                                                                                                                                                                                 | 119/860             | 0.86 (0.59, 1.25)        |
| ≥Median                                                                                                                                                                                                                 | 128/857             | 0.79 (0.55, 1.15)        |
| <i>P</i> -trend <sup>e</sup>                                                                                                                                                                                            |                     | 0.300                    |
| <sup>a</sup> Adjusted for year of first employment and education, and stratified by 10-year birth cohorts.                                                                                                              |                     |                          |
| <sup>b</sup> Missing: Year of first employment (n=1), education (n=21).                                                                                                                                                 |                     |                          |
| <sup>c</sup> Cumulative exposure: Job-exposure matrix (JEM)-rating multiplied by duration (in years) for each employment period and summarised for each individual from the start of employment until 31 December 1998. |                     |                          |
| <sup>d</sup> Cox regression adapted to a case cohort design with age as the time scale.                                                                                                                                 |                     |                          |
| <sup>e</sup> Modelled as a continuous variable to test for linear trend.                                                                                                                                                |                     |                          |

**Supplementary Table S3:** Hazard Ratios (HR) and 95% confidence intervals (95% CI) of aggressive prostate cancer by work schedule category, showing only the mixed work category divided into mostly day work, mostly night shift work, and mostly rollover shift work.

|                                                                                                                  | Work schedule exposure category <sup>a, b, c</sup> |                         |                            |
|------------------------------------------------------------------------------------------------------------------|----------------------------------------------------|-------------------------|----------------------------|
|                                                                                                                  | Mostly day work                                    | Mostly night shift work | Mostly rollover shift work |
| Mixed work, n (cases/non-cases)                                                                                  | 25/160                                             | 0/24                    | 28/134                     |
| HR (95% CI) <sup>d</sup>                                                                                         | 1.11 (0.69–1.78)                                   | NA                      | 1.50 (0.93–2.42)           |
| <sup>a</sup> Adjusted for year of first employment and education, and stratified by 10-year birth cohorts.       |                                                    |                         |                            |
| <sup>b</sup> Complete work history i.e. up to eight employments as an offshore worker.                           |                                                    |                         |                            |
| <sup>c</sup> Missing: Work schedule exposure category (n=119), year of first employment (n=1), education (n=21). |                                                    |                         |                            |
| <sup>d</sup> Cox regression adapted to a case cohort design with age as the time scale.                          |                                                    |                         |                            |
